# Supplementary material for: Survival Outcomes in Squamous Cell Carcinoma of the External Auditory Canal: A Systematic Review and Meta-Analysis
Source: MDPI journal article supplement (doi:10.3390/jcm12072490), 2023-03-24
Supplement: s1 [file s1]

Table S2. Quality assessment score for each included study, based on the Newcastle-Ottawa scale (NOS).

| Author                      | Selection                                |                                     |                           |                                                                          | Comparability                                                   | Outcome               |                                                 |                                  | Total |
|-----------------------------|------------------------------------------|-------------------------------------|---------------------------|--------------------------------------------------------------------------|-----------------------------------------------------------------|-----------------------|-------------------------------------------------|----------------------------------|-------|
|                             | Representativeness of the exposed cohort | Selection of the non-exposed cohort | Ascertainment of exposure | Demonstration that outcome of interest was not present at start of study | Comparability of cohorts on the basis of the design or analysis | Assessment of outcome | Was follow-up long enough for outcomes to occur | Adequacy of follow up of cohorts |       |
| Choi et al. [22]            | x                                        | /                                   | x                         | x                                                                        | /                                                               | x                     | x                                               | x                                | 6     |
| Martinez-Devesa et al. [23] | x                                        | /                                   |                           | x                                                                        | /                                                               |                       |                                                 | x                                | 3     |
| Bibas et al. [24]           | x                                        | /                                   |                           | x                                                                        | /                                                               | x                     | x                                               |                                  | 4     |
| Kunst et al. [25]           | x                                        | /                                   | x                         | x                                                                        | /                                                               | x                     |                                                 | x                                | 5     |
| Chang et al. [26]           | x                                        | /                                   | x                         | x                                                                        | /                                                               | x                     | x                                               | x                                | 6     |
| Ito et al. [27]             | x                                        | /                                   | x                         | x                                                                        | /                                                               | x                     | x                                               | x                                | 6     |
| Bacciu et al. [28]          | x                                        | /                                   | x                         | x                                                                        | /                                                               | x                     | x                                               | x                                | 6     |
| Ouaz et al. [29]            |                                          | /                                   | x                         | x                                                                        | /                                                               | x                     |                                                 | x                                | 4     |
| Zhen et al. [30]            | x                                        | /                                   | x                         | x                                                                        | /                                                               | x                     |                                                 | x                                | 5     |
| Wierzbicka et al. [31]      | x                                        | /                                   | x                         | x                                                                        | /                                                               | x                     | x                                               | x                                | 6     |
| Park et al. [32]            | x                                        | /                                   | x                         | x                                                                        | /                                                               | x                     |                                                 | x                                | 5     |
| Ngu et al. [33]             |                                          | /                                   | x                         | x                                                                        | /                                                               | x                     | x                                               | x                                | 5     |

|                                     |   |   |   |   |   |   |   |   |   |
|-------------------------------------|---|---|---|---|---|---|---|---|---|
| <b>Sajio et al.</b><br><b>[34]</b>  | x | / |   | x | / | x | x | x | 5 |
| <b>Smit et al.</b><br><b>[35]</b>   | x | / | x | x | / | x | x | x | 6 |
| <b>Mazzoni et</b><br><b>al. [4]</b> | x | / | x | x | / | x | x | x | 6 |
