# Supplementary material for: Survival Outcomes in Squamous Cell Carcinoma of the External Auditory Canal: A Systematic Review and Meta-Analysis
Source: J Clin Med. 2023 Mar 24;12(7):2490. doi: 10.3390/jcm12072490 (PMC10094887; doi:10.3390/jcm12072490)
Supplement: Supplementary file 1 [file jcm-12-02490-s001.zip]

Archive with 5 entries (5 files):
- Figure S1a-b_K-M.tif
- Figure S2a-b_OS.tif
- Figure S3a-b-c-d_Funnel.tif
- Table S1_PRISMA_checklist_2020.pdf
- Table S2.pdf
